# Supplementary material
Source: PubMed Central journal article supplement (PMC5026189)

## C -Terminus -- Neuronal Labeling TCG

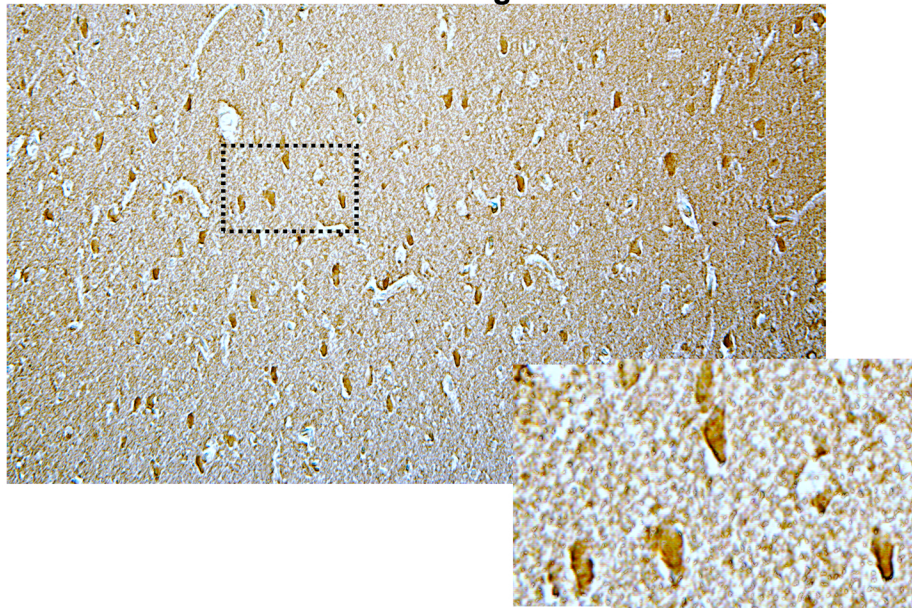

Pleiss et al Supp Figure 2

Supplement: NIHMS788937-supplement-2.pdf [file NIHMS788937-supplement-2.pdf]
